# Supplementary material
Source: PubMed Central journal article supplement (PMC7067675)
Supplement: NIHMS1550598-supplement-Supplemental_References.pdf [file NIHMS1550598-supplement-Supplemental_References.pdf]

## **Supplemental References**

### **Report of the NHLBI Working Group on Hypertension: Barriers to Translation**

Curt D. Sigmund, PhD, Medical College of Wisconsin, Milwaukee, WI  
Robert M. Carey, MD, University of Virginia, Charlottesville, VA  
Lawrence Appel, MD, Johns Hopkins University, Baltimore, MD  
Donna Arnett, PhD, University of Kentucky, Lexington, KY  
Hayden B. Bosworth, PhD, Duke University, Durham, NC  
William C. Cushman, MD, Veterans Affairs Medical Center, Memphis, TN  
Zorina S. Galis, Vascular Biology & Hypertension Branch, DCVS, NHLBI  
Melissa Green Parker, PhD, Health Inequities and Global Health Branch, CTRIS, NHLBI  
John E. Hall, PhD, University of Mississippi Medical Center, Jackson, MS  
David G. Harrison, MD, Vanderbilt University, Nashville, TN  
Alicia A. McDonough, PhD, University of Southern California, Los Angeles, CA  
Holly L. Nicastro, PhD, MPH, Clinical Applications and Prevention Branch, DCVS,  
NHLBI  
Suzanne Oparil, MD, University of Alabama at Birmingham, Birmingham, AL  
John W. Osborn Jr, PhD, University of Minnesota, Minneapolis, MN  
Mohan K. Raizada, PhD, University of Florida, Gainesville, FL  
Jacqueline D. Wright, DrPH, Epidemiology Branch, DCVS, NHLBI  
Young S. Oh, PhD, Vascular Biology & Hypertension Branch, DCVS, NHLBI

**\*Corresponding Author:**

Curt D. Sigmund, Ph.D.  
Department of Physiology  
Medical College of Wisconsin  
8701 Watertown Plank Road  
Milwaukee, WI 53226-0509  
Phone: 414-955-8277  
E-mail: [csigmund@mcw.edu](mailto:csigmund@mcw.edu)

**New Mediators of Systemic Vasoconstriction and Arterial Stiffness.**

List of citations derived the NHLBI initiative to understand the relationships between arterial stiffening and hypertension. <sup>1-275</sup>

**Precision Medicine in Hypertension.**

List of citations deemed to assess the limits of current knowledge and avenues for future research. <sup>276-316</sup>

## Supplemental References

1. Latorre M and Humphrey JD. Mechanobiological Stability of Biological Soft Tissues. *J Mech Phys Solids*. 2019;125:298-325.
2. Cuomo F, Ferruzzi J, Agarwal P, Li C, Zhuang ZW, Humphrey JD and Figueroa CA. Sex-dependent differences in central artery haemodynamics in normal and fibulin-5 deficient mice: implications for ageing. *Proc Math Phys Eng Sci*. 2019;475:20180076.
3. Latorre M and Humphrey JD. A Mechanobiologically Equilibrated Constrained Mixture Model for Growth and Remodeling of Soft Tissues. *Z Angew Math Mech*. 2018;98:2048-2071.
4. van Bakel TMJ, Arthurs CJ, Nauta FJH, Eagle KA, van Herwaarden JA, Moll FL, Trimarchi S, Patel HJ and Figueroa CA. Cardiac remodelling following thoracic endovascular aortic repair for descending aortic aneurysms. *Eur J Cardiothorac Surg*. 2019;55:1061-1070.
5. Caulk AW, Humphrey JD and Murtada SI. Fundamental Roles of Axial Stretch in Isometric and Isobaric Evaluations of Vascular Contractility. *J Biomech Eng*. 2019;141.
6. Humphrey JD and Tellides G. Central artery stiffness and thoracic aortopathy. *Am J Physiol Heart Circ Physiol*. 2019;316:H169-h182.
7. Korneva A and Humphrey JD. Maladaptive aortic remodeling in hypertension associates with dysfunctional smooth muscle contractility. *Am J Physiol Heart Circ Physiol*. 2019;316:H265-h278.
8. Korneva A, Zilberberg L, Rifkin DB, Humphrey JD and Bellini C. Absence of LTBP-3 attenuates the aneurysmal phenotype but not spinal effects on the aorta in Marfan syndrome. *Biomech Model Mechanobiol*. 2019;18:261-273.
9. Bersi MR, Bellini C, Humphrey JD and Avril S. Local variations in material and structural properties characterize murine thoracic aortic aneurysm mechanics. *Biomech Model Mechanobiol*. 2019;18:203-218.
10. Ferruzzi J, Di Achille P, Tellides G and Humphrey JD. Combining in vivo and in vitro biomechanical data reveals key roles of perivascular tethering in central artery function. *PLoS One*. 2018;13:e0201379.
11. Latorre M and Humphrey JD. Modeling mechano-driven and immuno-mediated aortic maladaptation in hypertension. *Biomech Model Mechanobiol*. 2018;17:1497-1511.
12. Ferruzzi J, Madziva D, Caulk AW, Tellides G and Humphrey JD. Compromised mechanical homeostasis in arterial aging and associated cardiovascular consequences. *Biomech Model Mechanobiol*. 2018;17:1281-1295.
13. Oh YS, Berkowitz DE, Cohen RA, Figueroa CA, Harrison DG, Humphrey JD, Larson DF, Leopold JA, Mecham RP, Ruiz-Opazo N, Santhanam L, Seta F, Shyy JYJ, Sun Z, Tsao PS, Wagenseil JE and Galis ZS. A Special Report on the NHLBI Initiative to Study Cellular and Molecular Mechanisms of Arterial Stiffness and Its Association With Hypertension. *Circ Res*. 2017;121:1216-1218.
14. Bersi MR, Khosravi R, Wujciak AJ, Harrison DG and Humphrey JD. Differential cell-matrix mechanoadaptations and inflammation drive regional propensities to aortic fibrosis, aneurysm or dissection in hypertension. *J R Soc Interface*. 2017;14.
15. Murtada SI, Humphrey JD and Holzapfel GA. Multiscale and Multiaxial Mechanics of Vascular Smooth Muscle. *Biophys J*. 2017;113:714-727.

16. Jiao Y, Li G, Li Q, Ali R, Qin L, Li W, Qyang Y, Greif DM, Geirsson A, Humphrey JD and Tellides G. mTOR (Mechanistic Target of Rapamycin) Inhibition Decreases Mechanosignaling, Collagen Accumulation, and Stiffening of the Thoracic Aorta in Elastin-Deficient Mice. *Arterioscler Thromb Vasc Biol.* 2017;37:1657-1666.
17. Humphrey JD and Milewicz DM. Aging, Smooth Muscle Vitality, and Aortic Integrity. *Circ Res.* 2017;120:1849-1851.
18. Bellini C, Bersi MR, Caulk AW, Ferruzzi J, Milewicz DM, Ramirez F, Rifkin DB, Tellides G, Yanagisawa H and Humphrey JD. Comparison of 10 murine models reveals a distinct biomechanical phenotype in thoracic aortic aneurysms. *J R Soc Interface.* 2017;14.
19. Bellini C, Kristofik NJ, Bersi MR, Kyriakides TR and Humphrey JD. A hidden structural vulnerability in the thrombospondin-2 deficient aorta increases the propensity to intramural delamination. *J Mech Behav Biomed Mater.* 2017;71:397-406.
20. Cuomo F, Roccabianca S, Dillon-Murphy D, Xiao N, Humphrey JD and Figueroa CA. Effects of age-associated regional changes in aortic stiffness on human hemodynamics revealed by computational modeling. *PLoS One.* 2017;12:e0173177.
21. Stepan J, Bergman Y, Viegas K, Armstrong D, Tan S, Wang H, Melucci S, Hori D, Park SY, Barreto SF, Isak A, Jandu S, Flavahan N, Butlin M, An SS, Avolio A, Berkowitz DE, Halushka MK and Santhanam L. Tissue Transglutaminase Modulates Vascular Stiffness and Function Through Crosslinking-Dependent and Crosslinking-Independent Functions. *J Am Heart Assoc.* 2017;6.
22. Bellini C, Caulk AW, Li G, Tellides G and Humphrey JD. Biomechanical Phenotyping of the Murine Aorta: What Is the Best Control? *J Biomech Eng.* 2017;139.
23. Foss JD, Kirabo A and Harrison DG. Do high-salt microenvironments drive hypertensive inflammation? *Am J Physiol Regul Integr Comp Physiol.* 2017;312:R1-r4.
24. Loperena R and Harrison DG. Oxidative Stress and Hypertensive Diseases. *Med Clin North Am.* 2017;101:169-193.
25. Ferruzzi J, Bersi MR, Mecham RP, Ramirez F, Yanagisawa H, Tellides G and Humphrey JD. Loss of Elastic Fiber Integrity Compromises Common Carotid Artery Function: Implications for Vascular Aging. *Artery Res.* 2016;14:41-52.
26. Stepan J, Tran HT, Bead VR, Oh YJ, Sikka G, Bivalacqua TJ, Burnett AL, Berkowitz DE and Santhanam L. Arginase Inhibition Reverses Endothelial Dysfunction, Pulmonary Hypertension, and Vascular Stiffness in Transgenic Sickle Cell Mice. *Anesth Analg.* 2016;123:652-658.
27. Oh YJ, Pau VC, Stepan J, Sikka G, Bead VR, Nyhan D, Levine BD, Berkowitz DE and Santhanam L. Role of tissue transglutaminase in age-associated ventricular stiffness. *Amino Acids.* 2017;49:695-704.
28. Fry JL, Al Sayah L, Weisbrod RM, Van Roy I, Weng X, Cohen RA, Bachschmid MM and Seta F. Vascular Smooth Muscle Sirtuin-1 Protects Against Diet-Induced Aortic Stiffness. *Hypertension.* 2016;68:775-784.
29. Nagababu E, Scott AV, Johnson DJ, Goyal A, Lipsitz JA, Barodka VM, Berkowitz DE and Frank SM. The Impact of Surgery and Stored Red Blood Cell Transfusions on Nitric Oxide Homeostasis. *Anesth Analg.* 2016;123:274-282.
30. Alastruey J, Xiao N, Fok H, Schaeffter T and Figueroa CA. On the impact of modelling assumptions in multi-scale, subject-specific models of aortic haemodynamics. *J R Soc Interface.* 2016;13.

31. Itani HA, McMaster WG, Jr., Saleh MA, Nazarewicz RR, Mikolajczyk TP, Kaszuba AM, Konior A, Prejbisz A, Januszewicz A, Norlander AE, Chen W, Bonami RH, Marshall AF, Poffenberger G, Weyand CM, Madhur MS, Moore DJ, Harrison DG and Guzik TJ. Activation of Human T Cells in Hypertension: Studies of Humanized Mice and Hypertensive Humans. *Hypertension*. 2016;68:123-132.
32. Bersi MR, Bellini C, Di Achille P, Humphrey JD, Genovese K and Avril S. Novel Methodology for Characterizing Regional Variations in the Material Properties of Murine Aortas. *J Biomech Eng*. 2016;138.
33. Cyron CJ, Aydin RC and Humphrey JD. A homogenized constrained mixture (and mechanical analog) model for growth and remodeling of soft tissue. *Biomech Model Mechanobiol*. 2016;15:1389-1403.
34. Bersi MR, Bellini C, Wu J, Montaniel KRC, Harrison DG and Humphrey JD. Excessive Adventitial Remodeling Leads to Early Aortic Maladaptation in Angiotensin-Induced Hypertension. *Hypertension*. 2016;67:890-896.
35. Ferruzzi J, Murtada SI, Li G, Jiao Y, Uman S, Ting MY, Tellides G and Humphrey JD. Pharmacologically Improved Contractility Protects Against Aortic Dissection in Mice With Disrupted Transforming Growth Factor-beta Signaling Despite Compromised Extracellular Matrix Properties. *Arterioscler Thromb Vasc Biol*. 2016;36:919-927.
36. Itani HA, Xiao L, Saleh MA, Wu J, Pilkinton MA, Dale BL, Barbaro NR, Foss JD, Kirabo A, Montaniel KR, Norlander AE, Chen W, Sato R, Navar LG, Mallal SA, Madhur MS, Bernstein KE and Harrison DG. CD70 Exacerbates Blood Pressure Elevation and Renal Damage in Response to Repeated Hypertensive Stimuli. *Circ Res*. 2016;118:1233-1243.
37. Murtada SI, Ferruzzi J, Yanagisawa H and Humphrey JD. Reduced Biaxial Contractility in the Descending Thoracic Aorta of Fibulin-5 Deficient Mice. *J Biomech Eng*. 2016;138:051008.
38. Scott AV, Nagababu E, Johnson DJ, Kebaish KM, Lipsitz JA, Dwyer IM, Zuckerberg GS, Barodka VM, Berkowitz DE and Frank SM. 2,3-Diphosphoglycerate Concentrations in Autologous Salvaged Versus Stored Red Blood Cells and in Surgical Patients After Transfusion. *Anesth Analg*. 2016;122:616-623.
39. Humphrey JD, Harrison DG, Figueroa CA, Lacolley P and Laurent S. Central Artery Stiffness in Hypertension and Aging: A Problem With Cause and Consequence. *Circ Res*. 2016;118:379-381.
40. Nagababu E, Scott AV, Johnson DJ, Dwyer IM, Lipsitz JA, Barodka VM, Berkowitz DE and Frank SM. Oxidative stress and rheologic properties of stored red blood cells before and after transfusion to surgical patients. *Transfusion*. 2016;56:1101-1111.
41. Bellini C, Korneva A, Zilberberg L, Ramirez F, Rifkin DB and Humphrey JD. Differential ascending and descending aortic mechanics parallel aneurysmal propensity in a mouse model of Marfan syndrome. *J Biomech*. 2016;49:2383-2389.
42. Wu J, Montaniel KR, Saleh MA, Xiao L, Chen W, Owens GK, Humphrey JD, Majesky MW, Paik DT, Hatzopoulos AK, Madhur MS and Harrison DG. Origin of Matrix-Producing Cells That Contribute to Aortic Fibrosis in Hypertension. *Hypertension*. 2016;67:461-468.
43. Wu J, Saleh MA, Kirabo A, Itani HA, Montaniel KR, Xiao L, Chen W, Mernaugh RL, Cai H, Bernstein KE, Goronzy JJ, Weyand CM, Curci JA, Barbaro NR, Moreno H, Davies SS, Roberts LJ, 2nd, Madhur MS and Harrison DG. Immune activation caused by vascular oxidation promotes fibrosis and hypertension. *J Clin Invest*. 2016;126:50-67.

44. Kuo MM, Kim DH, Jandu S, Bergman Y, Tan S, Wang H, Pandey DR, Abraham TP, Shoukas AA, Berkowitz DE and Santhanam L. MPST but not CSE is the primary regulator of hydrogen sulfide production and function in the coronary artery. *Am J Physiol Heart Circ Physiol*. 2016;310:H71-79.
45. Majeed BA, Eberson LS, Tawinwung S, Larmonier N, Secomb TW and Larson DF. Functional aortic stiffness: role of CD4(+) T lymphocytes. *Front Physiol*. 2015;6:235.
46. Fry JL, Shiraishi Y, Turcotte R, Yu X, Gao YZ, Akiki R, Bachschmid M, Zhang Y, Morgan KG, Cohen RA and Seta F. Vascular Smooth Muscle Sirtuin-1 Protects Against Aortic Dissection During Angiotensin II-Induced Hypertension. *J Am Heart Assoc*. 2015;4:e002384.
47. Shah KH, Shi P, Giani JF, Janjulia T, Bernstein EA, Li Y, Zhao T, Harrison DG, Bernstein KE and Shen XZ. Myeloid Suppressor Cells Accumulate and Regulate Blood Pressure in Hypertension. *Circ Res*. 2015;117:858-869.
48. Murtada SI, Lewin S, Arner A and Humphrey JD. Adaptation of active tone in the mouse descending thoracic aorta under acute changes in loading. *Biomech Model Mechanobiol*. 2016;15:579-592.
49. Xiao L, Kirabo A, Wu J, Saleh MA, Zhu L, Wang F, Takahashi T, Loperena R, Foss JD, Mernaugh RL, Chen W, Roberts J, 2nd, Osborn JW, Itani HA and Harrison DG. Renal Denervation Prevents Immune Cell Activation and Renal Inflammation in Angiotensin II-Induced Hypertension. *Circ Res*. 2015;117:547-557.
50. Maron BA and Leopold JA. Emerging Concepts in the Molecular Basis of Pulmonary Arterial Hypertension: Part II: Neurohormonal Signaling Contributes to the Pulmonary Vascular and Right Ventricular Pathophenotype of Pulmonary Arterial Hypertension. *Circulation*. 2015;131:2079-2091.
51. Leopold JA. The Central Role of Neutrophil Gelatinase-Associated Lipocalin in Cardiovascular Fibrosis. *Hypertension*. 2015;66:20-22.
52. Eberson LS, Sanchez PA, Majeed BA, Tawinwung S, Secomb TW and Larson DF. Effect of lysyl oxidase inhibition on angiotensin II-induced arterial hypertension, remodeling, and stiffness. *PLoS One*. 2015;10:e0124013.
53. Itani HA and Harrison DG. Memories that last in hypertension. *Am J Physiol Renal Physiol*. 2015;308:F1197-1199.
54. Hofmeister LH, Lee SH, Norlander AE, Montaniel KR, Chen W, Harrison DG and Sung HJ. Phage-display-guided nanocarrier targeting to atheroprone vasculature. *ACS Nano*. 2015;9:4435-4446.
55. McMaster WG, Kirabo A, Madhur MS and Harrison DG. Inflammation, immunity, and hypertensive end-organ damage. *Circ Res*. 2015;116:1022-1033.
56. Cuomo F, Ferruzzi J, Humphrey JD and Figueroa CA. An Experimental-Computational Study of Catheter Induced Alterations in Pulse Wave Velocity in Anesthetized Mice. *Ann Biomed Eng*. 2015;43:1555-1570.
57. Saleh MA, McMaster WG, Wu J, Norlander AE, Funt SA, Thabet SR, Kirabo A, Xiao L, Chen W, Itani HA, Michell D, Huan T, Zhang Y, Takaki S, Titze J, Levy D, Harrison DG and Madhur MS. Lymphocyte adaptor protein LNK deficiency exacerbates hypertension and end-organ inflammation. *J Clin Invest*. 2015;125:1189-1202.
58. Kamat NV, Thabet SR, Xiao L, Saleh MA, Kirabo A, Madhur MS, Delpire E, Harrison DG and McDonough AA. Renal transporter activation during angiotensin-II hypertension

- is blunted in interferon-gamma-/- and interleukin-17A-/- mice. *Hypertension*. 2015;65:569-576.
59. Lau KD and Figueroa CA. Simulation of short-term pressure regulation during the tilt test in a coupled 3D-0D closed-loop model of the circulation. *Biomech Model Mechanobiol*. 2015;14:915-929.
60. Ferruzzi J, Bersi MR, Uman S, Yanagisawa H and Humphrey JD. Decreased elastic energy storage, not increased material stiffness, characterizes central artery dysfunction in fibulin-5 deficiency independent of sex. *J Biomech Eng*. 2015;137.
61. Kuo MM, Barodka V, Abraham TP, Stepan J, Shoukas AA, Butlin M, Avolio A, Berkowitz DE and Santhanam L. Measuring ascending aortic stiffness in vivo in mice using ultrasound. *J Vis Exp*. 2014.
62. Sorrentino TA, Fourman L, Ferruzzi J, Miller KS, Humphrey JD and Roccabianca S. Local versus global mechanical effects of intramural swelling in carotid arteries. *J Biomech Eng*. 2015;137:041008.
63. Leopold JA. Obesity-related cardiomyopathy is an adipocyte-mediated paracrine disease. *Trends Cardiovasc Med*. 2015;25:127-128.
64. Leopold JA. Vascular calcification: Mechanisms of vascular smooth muscle cell calcification. *Trends Cardiovasc Med*. 2015;25:267-274.
65. Sikka G, Hussmann GP, Pandey D, Cao S, Hori D, Park JT, Stepan J, Kim JH, Barodka V, Myers AC, Santhanam L, Nyhan D, Halushka MK, Koehler RC, Snyder SH, Shimoda LA and Berkowitz DE. Melanopsin mediates light-dependent relaxation in blood vessels. *Proc Natl Acad Sci U S A*. 2014;111:17977-17982.
66. Leopold JA. Antioxidants and coronary artery disease: from pathophysiology to preventive therapy. *Coron Artery Dis*. 2015;26:176-183.
67. Leopold JA. Neoatherosclerosis: another consequence of endothelial dysfunction? *Circ Cardiovasc Interv*. 2014;7:635-637.
68. Leopold JA. MicroRNAs Regulate Vascular Medial Calcification. *Cells*. 2014;3:963-980.
69. Cyron CJ and Humphrey JD. Vascular homeostasis and the concept of mechanobiological stability. *Int J Eng Sci*. 2014;85:203-223.
70. Trott DW, Thabet SR, Kirabo A, Saleh MA, Itani H, Norlander AE, Wu J, Goldstein A, Arendshorst WJ, Madhur MS, Chen W, Li CI, Shyr Y and Harrison DG. Oligoclonal CD8+ T cells play a critical role in the development of hypertension. *Hypertension*. 2014;64:1108-1115.
71. Majeed B, Tawinwung S, Ebersson LS, Secomb TW, Larmonier N and Larson DF. Interleukin-2/Anti-Interleukin-2 Immune Complex Expands Regulatory T Cells and Reduces Angiotensin II-Induced Aortic Stiffening. *Int J Hypertens*. 2014;2014:126365.
72. Kirabo A, Fontana V, de Faria AP, Loperena R, Galindo CL, Wu J, Bikineyeva AT, Dikalov S, Xiao L, Chen W, Saleh MA, Trott DW, Itani HA, Vinh A, Amarnath V, Amarnath K, Guzik TJ, Bernstein KE, Shen XZ, Shyr Y, Chen SC, Mernaugh RL, Laffer CL, Eljovich F, Davies SS, Moreno H, Madhur MS, Roberts J, 2nd and Harrison DG. DC isoketal-modified proteins activate T cells and promote hypertension. *J Clin Invest*. 2014;124:4642-4656.
73. Cyron CJ, Wilson JS and Humphrey JD. Mechanobiological stability: a new paradigm to understand the enlargement of aneurysms? *J R Soc Interface*. 2014;11:20140680.

74. Harrison DG. Basic science: Pathophysiology: oxidative stress. *J Am Soc Hypertens.* 2014;8:601-603.
75. Maron BA, Oldham WM, Chan SY, Vargas SO, Arons E, Zhang YY, Loscalzo J and Leopold JA. Upregulation of steroidogenic acute regulatory protein by hypoxia stimulates aldosterone synthesis in pulmonary artery endothelial cells to promote pulmonary vascular fibrosis. *Circulation.* 2014;130:168-179.
76. Bersi MR, Collins MJ, Wilson E and Humphrey JD. Disparate Changes in the Mechanical Properties of Murine Carotid Arteries and Aorta in Response to Chronic Infusion of Angiotensin-II. *Int J Adv Eng Sci Appl Math.* 2013;4:228-240.
77. Roccabianca S, Bellini C and Humphrey JD. Computational modelling suggests good, bad and ugly roles of glycosaminoglycans in arterial wall mechanics and mechanobiology. *J R Soc Interface.* 2014;11:20140397.
78. Mei Y, Thompson MD, Cohen RA and Tong X. Autophagy and oxidative stress in cardiovascular diseases. *Biochim Biophys Acta.* 2015;1852:243-251.
79. Seta F and Cohen RA. The endothelium: paracrine mediator of aortic dissection. *Circulation.* 2014;129:2629-2632.
80. Salaria ON, Barodka VM, Hogue CW, Berkowitz DE, Ness PM, Wasey JO and Frank SM. Impaired red blood cell deformability after transfusion of stored allogeneic blood but not autologous salvaged blood in cardiac surgery patients. *Anesth Analg.* 2014;118:1179-1187.
81. Swyer TW, Strom J and Larson DF. Nanoparticle oxygen delivery to the ischemic heart. *Perfusion.* 2014;29:539-543.
82. Leopold JA. Microvascular dysfunction: genetic polymorphisms suggest sex-specific differences in disease phenotype. *Coron Artery Dis.* 2014;25:275-276.
83. Steppan J, Sikka G, Jandu S, Barodka V, Halushka MK, Flavahan NA, Belkin AM, Nyhan D, Butlin M, Avolio A, Berkowitz DE and Santhanam L. Exercise, vascular stiffness, and tissue transglutaminase. *J Am Heart Assoc.* 2014;3:e000599.
84. Qin Z, Hou X, Weisbrod RM, Seta F, Cohen RA and Tong X. Nox2 mediates high fat high sucrose diet-induced nitric oxide dysfunction and inflammation in aortic smooth muscle cells. *J Mol Cell Cardiol.* 2014;72:56-63.
85. Mei Y, Thompson MD, Cohen RA and Tong X. Endoplasmic Reticulum Stress and Related Pathological Processes. *J Pharmacol Biomed Anal.* 2013;1:1000107.
86. Bersi MR, Ferruzzi J, Eberth JF, Gleason RL, Jr. and Humphrey JD. Consistent biomechanical phenotyping of common carotid arteries from seven genetic, pharmacological, and surgical mouse models. *Ann Biomed Eng.* 2014;42:1207-1223.
87. Wu J, Thabet SR, Kirabo A, Trott DW, Saleh MA, Xiao L, Madhur MS, Chen W and Harrison DG. Inflammation and mechanical stretch promote aortic stiffening in hypertension through activation of p38 mitogen-activated protein kinase. *Circ Res.* 2014;114:616-625.
88. Handy DE, Loscalzo J and Leopold JA. Systems analysis of oxidant stress in the vasculature. *IUBMB Life.* 2013;65:911-920.
89. Barodka VM, Nagababu E, Mohanty JG, Nyhan D, Berkowitz DE, Rifkind JM and Strouse JJ. New insights provided by a comparison of impaired deformability with erythrocyte oxidative stress for sickle cell disease. *Blood Cells Mol Dis.* 2014;52:230-235.



90. Bellini C, Ferruzzi J, Roccabianca S, Di Martino ES and Humphrey JD. A microstructurally motivated model of arterial wall mechanics with mechanobiological implications. *Ann Biomed Eng.* 2014;42:488-502.
91. Leopold JA. Prohealing endothelial progenitor cell capture stents: do the cells captured explain the clinical outcomes? *Circ Cardiovasc Interv.* 2013;6:494-495.
92. Sikka G, Pandey D, Bhuniya AK, Steppan J, Armstrong D, Santhanam L, Nyhan D and Berkowitz DE. Contribution of arginase activation to vascular dysfunction in cigarette smoking. *Atherosclerosis.* 2013;231:91-94.
93. Xiao N, Alastruey J and Alberto Figueroa C. A systematic comparison between 1-D and 3-D hemodynamics in compliant arterial models. *Int J Numer Method Biomed Eng.* 2014;30:204-231.
94. Titze J, Dahlmann A, Lerchl K, Kopp C, Rakova N, Schroder A and Luft FC. Spooky sodium balance. *Kidney Int.* 2014;85:759-767.
95. Weisbrod RM, Shiang T, Al Sayah L, Fry JL, Bajpai S, Reinhart-King CA, Lob HE, Santhanam L, Mitchell G, Cohen RA and Seta F. Arterial stiffening precedes systolic hypertension in diet-induced obesity. *Hypertension.* 2013;62:1105-1110.
96. Leopold JA. Cellular and molecular mechanisms of arterial stiffness associated with obesity. *Hypertension.* 2013;62:1003-1004.
97. Jung SM, Jandu S, Steppan J, Belkin A, An SS, Pak A, Choi EY, Nyhan D, Butlin M, Viegas K, Avolio A, Berkowitz DE and Santhanam L. Increased tissue transglutaminase activity contributes to central vascular stiffness in eNOS knockout mice. *Am J Physiol Heart Circ Physiol.* 2013;305:H803-810.
98. Hadri L, Kratlian RG, Benard L, Maron BA, Dorfmueller P, Ladage D, Guignabert C, Ishikawa K, Aguero J, Ibanez B, Turnbull IC, Kohlbrenner E, Liang L, Zsebo K, Humbert M, Hulot JS, Kawase Y, Hajjar RJ and Leopold JA. Therapeutic efficacy of AAV1.SERCA2a in monocrotaline-induced pulmonary arterial hypertension. *Circulation.* 2013;128:512-523.
99. Maron BA, Waxman AB, Opatowsky AR, Gillies H, Blair C, Aghamohammadzadeh R, Loscalzo J and Leopold JA. Effectiveness of spironolactone plus ambrisentan for treatment of pulmonary arterial hypertension (from the [ARIES] study 1 and 2 trials). *Am J Cardiol.* 2013;112:720-725.
100. Xiao N, Humphrey JD and Figueroa CA. Multi-Scale Computational Model of Three-Dimensional Hemodynamics within a Deformable Full-Body Arterial Network. *J Comput Phys.* 2013;244:22-40.
101. Wiig H, Schroder A, Neuhofer W, Jantsch J, Kopp C, Karlsen TV, Boschmann M, Goss J, Bry M, Rakova N, Dahlmann A, Brenner S, Tenstad O, Nurmi H, Mervaala E, Wagner H, Beck FX, Muller DN, Kerjaschki D, Luft FC, Harrison DG, Alitalo K and Titze J. Immune cells control skin lymphatic electrolyte homeostasis and blood pressure. *J Clin Invest.* 2013;123:2803-2815.
102. Madhur MS and Harrison DG. Senescent T cells and hypertension: new ideas about old cells. *Hypertension.* 2013;62:13-15.
103. Valentin A, Humphrey JD and Holzapfel GA. A finite element-based constrained mixture implementation for arterial growth, remodeling, and adaptation: theory and numerical verification. *Int J Numer Method Biomed Eng.* 2013;29:822-849.
104. Leopold JA. Vascular calcification: an age-old problem of old age. *Circulation.* 2013;127:2380-2382.

105. Chow K, Fessel JP, Kaorihiida S, Schmidt EP, Gaskill C, Alvarez D, Graham B, Harrison DG, Wagner DH, Jr., Nozik-Grayck E, West JD, Klemm DJ and Majka SM. Dysfunctional resident lung mesenchymal stem cells contribute to pulmonary microvascular remodeling. *Pulm Circ.* 2013;3:31-49.
106. Itani HA, Dikalov S and Harrison DG. Knock, knock: who's there?: Nox1. *Circulation.* 2013;127:1850-1852.
107. Ferruzzi J, Bersi MR and Humphrey JD. Biomechanical phenotyping of central arteries in health and disease: advantages of and methods for murine models. *Ann Biomed Eng.* 2013;41:1311-1330.
108. Pech V, Thumova M, Dikalov SI, Hummler E, Rossier BC, Harrison DG and Wall SM. Nitric oxide reduces Cl(-) absorption in the mouse cortical collecting duct through an ENaC-dependent mechanism. *Am J Physiol Renal Physiol.* 2013;304:F1390-1397.
109. Roccabianca S, Figueroa CA, Tellides G and Humphrey JD. Quantification of regional differences in aortic stiffness in the aging human. *J Mech Behav Biomed Mater.* 2014;29:618-634.
110. Frank SM, Abazyan B, Ono M, Hogue CW, Cohen DB, Berkowitz DE, Ness PM and Barodka VM. Decreased erythrocyte deformability after transfusion and the effects of erythrocyte storage duration. *Anesth Analg.* 2013;116:975-981.
111. Harrison DG. The mosaic theory revisited: common molecular mechanisms coordinating diverse organ and cellular events in hypertension. *J Am Soc Hypertens.* 2013;7:68-74.
112. Balderman JA, Lee HY, Mahoney CE, Handy DE, White K, Annis S, Lebeche D, Hajjar RJ, Loscalzo J and Leopold JA. Bone morphogenetic protein-2 decreases microRNA-30b and microRNA-30c to promote vascular smooth muscle cell calcification. *J Am Heart Assoc.* 2012;1:e003905.
113. Lob HE, Schultz D, Marvar PJ, Davisson RL and Harrison DG. Role of the NADPH oxidases in the subfornical organ in angiotensin II-induced hypertension. *Hypertension.* 2013;61:382-387.
114. Hecker PA, Leopold JA, Gupte SA, Recchia FA and Stanley WC. Impact of glucose-6-phosphate dehydrogenase deficiency on the pathophysiology of cardiovascular disease. *Am J Physiol Heart Circ Physiol.* 2013;304:H491-500.
115. Zhang Z, Yang Z, Zhu B, Hu J, Liew CW, Zhang Y, Leopold JA, Handy DE, Loscalzo J and Stanton RC. Increasing glucose 6-phosphate dehydrogenase activity restores redox balance in vascular endothelial cells exposed to high glucose. *PLoS One.* 2012;7:e49128.
116. Hecker PA, Lionetti V, Ribeiro RF, Jr., Rastogi S, Brown BH, O'Connell KA, Cox JW, Shekar KC, Gamble DM, Sabbah HN, Leopold JA, Gupte SA, Recchia FA and Stanley WC. Glucose 6-phosphate dehydrogenase deficiency increases redox stress and moderately accelerates the development of heart failure. *Circ Heart Fail.* 2013;6:118-126.
117. Hayenga HN, Hu JJ, Meyer CA, Wilson E, Hein TW, Kuo L and Humphrey JD. Differential progressive remodeling of coronary and cerebral arteries and arterioles in an aortic coarctation model of hypertension. *Front Physiol.* 2012;3:420.
118. Sikka G, Miller KL, Steppan J, Pandey D, Jung SM, Fraser CD, 3rd, Ellis C, Ross D, Vandegaer K, Bedja D, Gabrielson K, Walston JD, Berkowitz DE and Barouch LA. Interleukin 10 knockout frail mice develop cardiac and vascular dysfunction with increased age. *Exp Gerontol.* 2013;48:128-135.

119. Maron BA, Opotowsky AR, Landzberg MJ, Loscalzo J, Waxman AB and Leopold JA. Plasma aldosterone levels are elevated in patients with pulmonary arterial hypertension in the absence of left ventricular heart failure: a pilot study. *Eur J Heart Fail.* 2013;15:277-283.
120. Madhur MS and Harrison DG. Synapses, signals, CDs, and cytokines: interactions of the autonomic nervous system and immunity in hypertension. *Circ Res.* 2012;111:1113-1116.
121. Hasty AH and Harrison DG. Endoplasmic reticulum stress and hypertension - a new paradigm? *J Clin Invest.* 2012;122:3859-3861.
122. Marvar PJ and Harrison DG. Stress-dependent hypertension and the role of T lymphocytes. *Exp Physiol.* 2012;97:1161-1167.
123. Leopold JA. Cellular mechanisms of aortic valve calcification. *Circ Cardiovasc Interv.* 2012;5:605-614.
124. Steppan J, Nyhan SM, Sikka G, Uribe J, Ahuja A, White AR, Shoukas AA and Berkowitz DE. Vasopressin-mediated enhancement of adrenergic vasoconstriction involves both the tyrosine kinase and the protein kinase C pathways. *Anesth Analg.* 2012;115:1290-1295.
125. Maron BA, Zhang YY, White K, Chan SY, Handy DE, Mahoney CE, Loscalzo J and Leopold JA. Aldosterone inactivates the endothelin-B receptor via a cysteinyl thiol redox switch to decrease pulmonary endothelial nitric oxide levels and modulate pulmonary arterial hypertension. *Circulation.* 2012;126:963-974.
126. Mills B, Robb T and Larson DF. Intimal hyperplasia: slow but deadly. *Perfusion.* 2012;27:520-528.
127. Barodka V, Nyhan D and Berkowitz D. About fACE: perioperative use of angiotensin-converting enzyme inhibitors. *Circulation.* 2012;126:249-251.
128. Valentin A and Holzapfel GA. Constrained Mixture Models as Tools for Testing Competing Hypotheses in Arterial Biomechanics: A Brief Survey. *Mech Res Commun.* 2012;42:126-133.
129. Harrison DG and Guzik TJ. Studies of the T-cell angiotensin receptor using cre-lox technology: an unan-T-cellpated result. *Circ Res.* 2012;110:1543-1545.
130. Harrison DG, Marvar PJ and Titze JM. Vascular inflammatory cells in hypertension. *Front Physiol.* 2012;3:128.
131. Steppan J, Tran H, Benjo AM, Pellakuru L, Barodka V, Ryoo S, Nyhan SM, Lussman C, Gupta G, White AR, Daher JP, Shoukas AA, Levine BD and Berkowitz DE. Alagebrium in combination with exercise ameliorates age-associated ventricular and vascular stiffness. *Exp Gerontol.* 2012;47:565-572.
132. Osgood MJ, Harrison DG, Sexton KW, Hocking KM, Voskresensky IV, Komalavilas P, Cheung-Flynn J, Guzman RJ and Brophy CM. Role of the renin-angiotensin system in the pathogenesis of intimal hyperplasia: therapeutic potential for prevention of vein graft failure? *Ann Vasc Surg.* 2012;26:1130-1144.
133. Coogan JS, Humphrey JD and Figueroa CA. Computational simulations of hemodynamic changes within thoracic, coronary, and cerebral arteries following early wall remodeling in response to distal aortic coarctation. *Biomech Model Mechanobiol.* 2013;12:79-93.

134. Bayat H, Schroder K, Pimentel DR, Brandes RP, Verbeuren TJ, Cohen RA and Jiang B. Activation of thromboxane receptor modulates interleukin-1beta-induced monocyte adhesion--a novel role of Nox1. *Free Radic Biol Med.* 2012;52:1760-1766.
135. Collins MJ, Eberth JF, Wilson E and Humphrey JD. Acute mechanical effects of elastase on the infrarenal mouse aorta: implications for models of aneurysms. *J Biomech.* 2012;45:660-665.
136. Karsaj I and Humphrey JD. A Multilayered Wall Model of Arterial Growth and Remodeling. *Mech Mater.* 2012;44:110-119.
137. Santhanam L, Berkowitz DE and Belkin AM. Nitric oxide regulates non-classical secretion of tissue transglutaminase. *Commun Integr Biol.* 2011;4:584-586.
138. Leopold JA. Aldosterone, mineralocorticoid receptor activation, and cardiovascular remodeling. *Circulation.* 2011;124:e466-468.
139. Jandu SK, Webb AK, Pak A, Sevinc B, Nyhan D, Belkin AM, Flavahan NA, Berkowitz DE and Santhanam L. Nitric oxide regulates tissue transglutaminase localization and function in the vasculature. *Amino Acids.* 2013;44:261-269.
140. Mustafa AK, Sikka G, Gazi SK, Steppan J, Jung SM, Bhunia AK, Barodka VM, Gazi FK, Barrow RK, Wang R, Amzel LM, Berkowitz DE and Snyder SH. Hydrogen sulfide as endothelium-derived hyperpolarizing factor sulfhydrates potassium channels. *Circ Res.* 2011;109:1259-1268.
141. Doetschman T, Barnett JV, Runyan RB, Camenisch TD, Heimark RL, Granzier HL, Conway SJ and Azhar M. Transforming growth factor beta signaling in adult cardiovascular diseases and repair. *Cell Tissue Res.* 2012;347:203-223.
142. Liberman M, Johnson RC, Handy DE, Loscalzo J and Leopold JA. Bone morphogenetic protein-2 activates NADPH oxidase to increase endoplasmic reticulum stress and human coronary artery smooth muscle cell calcification. *Biochem Biophys Res Commun.* 2011;413:436-441.
143. Lubos E, Kelly NJ, Oldebeken SR, Leopold JA, Zhang YY, Loscalzo J and Handy DE. Glutathione peroxidase-1 deficiency augments proinflammatory cytokine-induced redox signaling and human endothelial cell activation. *J Biol Chem.* 2011;286:35407-35417.
144. Eberth JF, Cardamone L and Humphrey JD. Evolving biaxial mechanical properties of mouse carotid arteries in hypertension. *J Biomech.* 2011;44:2532-2537.
145. Dentin R, Tomas-Cobos L, Fougelle F, Leopold J, Girard J, Postic C and Ferre P. Glucose 6-phosphate, rather than xylulose 5-phosphate, is required for the activation of ChREBP in response to glucose in the liver. *J Hepatol.* 2012;56:199-209.
146. Conway SJ, Doetschman T and Azhar M. The inter-relationship of periostin, TGF beta, and BMP in heart valve development and valvular heart diseases. *ScientificWorldJournal.* 2011;11:1509-1524.
147. Azhar M, Brown K, Gard C, Chen H, Rajan S, Elliott DA, Stevens MV, Camenisch TD, Conway SJ and Doetschman T. Transforming growth factor Beta2 is required for valve remodeling during heart development. *Dev Dyn.* 2011;240:2127-2141.
148. Collins MJ, Bersi M, Wilson E and Humphrey JD. Mechanical properties of suprarenal and infrarenal abdominal aorta: implications for mouse models of aneurysms. *Med Eng Phys.* 2011;33:1262-1269.

149. Ferruzzi J, Collins MJ, Yeh AT and Humphrey JD. Mechanical assessment of elastin integrity in fibrillin-1-deficient carotid arteries: implications for Marfan syndrome. *Cardiovasc Res*. 2011;92:287-295.
150. Xu S, Jiang B, Hou X, Shi C, Bachschmid MM, Zang M, Verbeuren TJ and Cohen RA. High-fat diet increases and the polyphenol, S17834, decreases acetylation of the sirtuin-1-dependent lysine-382 on p53 and apoptotic signaling in atherosclerotic lesion-prone aortic endothelium of normal mice. *J Cardiovasc Pharmacol*. 2011;58:263-271.
151. Dunn J, Gutbrod S, Webb A, Pak A, Jandu SK, Bhunia A, Berkowitz DE and Santhanam L. S-nitrosation of arginase 1 requires direct interaction with inducible nitric oxide synthase. *Mol Cell Biochem*. 2011;355:83-89.
152. Jin RC, Mahoney CE, Coleman Anderson L, Ottaviano F, Croce K, Leopold JA, Zhang YY, Tang SS, Handy DE and Loscalzo J. Glutathione peroxidase-3 deficiency promotes platelet-dependent thrombosis in vivo. *Circulation*. 2011;123:1963-1973.
153. Barodka VM, Joshi BL, Berkowitz DE, Hogue CW, Jr. and Nyhan D. Review article: implications of vascular aging. *Anesth Analg*. 2011;112:1048-1060.
154. Valentin A, Humphrey JD and Holzapfel GA. A multi-layered computational model of coupled elastin degradation, vasoactive dysfunction, and collagenous stiffening in aortic aging. *Ann Biomed Eng*. 2011;39:2027-2045.
155. Leopold JA. Viral-derived Serp-1 as an adjunctive therapy for percutaneous coronary intervention: another not ready for prime time player? *Circ Cardiovasc Interv*. 2010;3:528-530.
156. Harrison DG, Guzik TJ, Lob HE, Madhur MS, Marvar PJ, Thabet SR, Vinh A and Weyand CM. Inflammation, immunity, and hypertension. *Hypertension*. 2011;57:132-140.
157. Chen K and Sun Z. Autophagy plays a critical role in Klotho gene deficiency-induced arterial stiffening and hypertension. *J Mol Med (Berl)*. 2019;97:1615-1625.
158. Li P, Halabi CM, Stewart R, Butler A, Brown B, Xia X, Santi C, England S, Ferreira J, Mecham RP and Salkoff L. Sodium-activated potassium channels moderate excitability in vascular smooth muscle. *J Physiol*. 2019;597:5093-5108.
159. Kim J, Cocciolone AJ, Staiculescu MC, Mecham RP and Wagenseil JE. Captopril treatment during development alleviates mechanically induced aortic remodeling in newborn elastin knockout mice. *Biomech Model Mechanobiol*. 2019.
160. Lee VS, Halabi CM, Broekelmann TJ, Trackman PC, Stitzel NO and Mecham RP. Intracellular retention of mutant lysyl oxidase leads to aortic dilation in response to increased hemodynamic stress. *JCI Insight*. 2019;5.
161. Yanagisawa H and Wagenseil J. Elastic fibers and biomechanics of the aorta: Insights from mouse studies. *Matrix Biol*. 2019.
162. Yamashiro Y, Thang BQ, Shin SJ, Lino CA, Nakamura T, Kim J, Sugiyama K, Tokunaga C, Sakamoto H, Osaka M, Davis EC, Wagenseil JE, Hiramatsu Y and Yanagisawa H. Role of Thrombospondin-1 in Mechanotransduction and Development of Thoracic Aortic Aneurysm in Mouse and Humans. *Circ Res*. 2018;123:660-672.
163. Wagenseil JE. Bio-chemo-mechanics of thoracic aortic aneurysms. *Curr Opin Biomed Eng*. 2018;5:50-57.
164. Adam M, Kooreman NG, Jagger A, Wagenhauser MU, Mehrkens D, Wang Y, Kayama Y, Toyama K, Raaz U, Schellinger IN, Maegdefessel L, Spin JM, Hamming JF, Quax PHA, Baldus S, Wu JC and Tsao PS. Systemic Upregulation of IL-10 (Interleukin-

- 10) Using a Nonimmunogenic Vector Reduces Growth and Rate of Dissecting Abdominal Aortic Aneurysm. *Arterioscler Thromb Vasc Biol.* 2018;38:1796-1805.
165. Luo Y, Li N, Chen H, Fernandez GE, Warburton D, Moats R, Mecham RP, Krenitsky D, Pryhuber GS and Shi W. Spatial and temporal changes in extracellular elastin and laminin distribution during lung alveolar development. *Sci Rep.* 2018;8:8334.
166. Kabir AU, Lee TJ, Pan H, Berry JC, Krchma K, Wu J, Liu F, Kang HK, Hinman K, Yang L, Hamilton S, Zhou Q, Veis DJ, Mecham RP, Wickline SA, Miller MJ and Choi K. Requisite endothelial reactivation and effective siRNA nanoparticle targeting of Etv2/Er71 in tumor angiogenesis. *JCI Insight.* 2018;3.
167. Chen K and Sun Z. Activation of DNA demethylases attenuates aging-associated arterial stiffening and hypertension. *Aging Cell.* 2018;17:e12762.
168. Chen J, Fan J, Wang S and Sun Z. Secreted Klotho Attenuates Inflammation-Associated Aortic Valve Fibrosis in Senescence-Accelerated Mice P1. *Hypertension.* 2018;71:877-885.
169. Zhang J, Dong J, Martin M, He M, Gongol B, Marin TL, Chen L, Shi X, Yin Y, Shang F, Wu Y, Huang HY, Zhang J, Zhang Y, Kang J, Moya EA, Huang HD, Powell FL, Chen Z, Thistlethwaite PA, Yuan ZY and Shyy JY. AMP-activated Protein Kinase Phosphorylation of Angiotensin-Converting Enzyme 2 in Endothelium Mitigates Pulmonary Hypertension. *Am J Respir Crit Care Med.* 2018;198:509-520.
170. Craft CS, Broekelmann TJ and Mecham RP. Microfibril-associated glycoproteins MAGP-1 and MAGP-2 in disease. *Matrix Biol.* 2018;71-72:100-111.
171. Turecamo SE, Walji TA, Broekelmann TJ, Williams JW, Ivanov S, Wee NK, Procknow JD, McManus MR, Randolph GJ, Scheller EL, Mecham RP and Craft CS. Contribution of metabolic disease to bone fragility in MAGP1-deficient mice. *Matrix Biol.* 2018;67:1-14.
172. Stoka KV, Maedeker JA, Bennett L, Bhayani SA, Gardner WS, Procknow JD, Cocciolone AJ, Walji TA, Craft CS and Wagenseil JE. Effects of Increased Arterial Stiffness on Atherosclerotic Plaque Amounts. *J Biomech Eng.* 2018;140.
173. Mecham RP. Elastin in lung development and disease pathogenesis. *Matrix Biol.* 2018;73:6-20.
174. Gabriela Espinosa M, Catalin Staiculescu M, Kim J, Marin E and Wagenseil JE. Elastic Fibers and Large Artery Mechanics in Animal Models of Development and Disease. *J Biomech Eng.* 2018;140.
175. Li R, Herriges JC, Chen L, Mecham RP and Sun X. FGF receptors control alveolar elastogenesis. *Development.* 2017;144:4563-4572.
176. Zhang J, Yin Y, Chen L, Chu C, Wang Y, Lv Y, He M, Martin M, Huang PH, Mu JJ, Shyy JY and Yuan ZY. Short-Term High-Salt Diet Increases Corin Level to Regulate the Salt-Water Balance in Humans and Rodents. *Am J Hypertens.* 2018;31:253-260.
177. Eekhoff JD, Fang F, Kahan LG, Espinosa G, Cocciolone AJ, Wagenseil JE, Mecham RP and Lake SP. Functionally Distinct Tendons From Elastin Haploinsufficient Mice Exhibit Mild Stiffening and Tendon-Specific Structural Alteration. *J Biomech Eng.* 2017;139.
178. Li Z, Martin M, Zhang J, Huang HY, Bai L, Zhang J, Kang J, He M, Li J, Maurya MR, Gupta S, Zhou G, Sangwung P, Xu YJ, Lei T, Huang HD, Jain M, Jain MK, Subramaniam S and Shyy JY. Kruppel-Like Factor 4 Regulation of Cholesterol-25-Hydroxylase and

- Liver X Receptor Mitigates Atherosclerosis Susceptibility. *Circulation*. 2017;136:1315-1330.
179. Kim J, Staiculescu MC, Cocciolone AJ, Yanagisawa H, Mecham RP and Wagenseil JE. Crosslinked elastic fibers are necessary for low energy loss in the ascending aorta. *J Biomech*. 2017;61:199-207.
180. Jung D, Xu Y and Sun Z. Induction of anti-aging gene *klotho* with a small chemical compound that demethylates CpG islands. *Oncotarget*. 2017;8:46745-46755.
181. Staiculescu MC, Kim J, Mecham RP and Wagenseil JE. Mechanical behavior and matrisome gene expression in the aneurysm-prone thoracic aorta of newborn lysyl oxidase knockout mice. *Am J Physiol Heart Circ Physiol*. 2017;313:H446-h456.
182. Halabi CM, Broekelmann TJ, Lin M, Lee VS, Chu ML and Mecham RP. Fibulin-4 is essential for maintaining arterial wall integrity in conduit but not muscular arteries. *Sci Adv*. 2017;3:e1602532.
183. Kugler MC, Loomis CA, Zhao Z, Cushman JC, Liu L and Munger JS. Sonic Hedgehog Signaling Regulates Myofibroblast Function during Alveolar Septum Formation in Murine Postnatal Lung. *Am J Respir Cell Mol Biol*. 2017;57:280-293.
184. Munjal C, Jegga AG, Opoka AM, Stoilov I, Norris RA, Thomas CJ, Smith JM, Mecham RP, Bressan GM and Hinton RB. Inhibition of MAPK-Erk pathway in vivo attenuates aortic valve disease processes in Emilin1-deficient mouse model. *Physiol Rep*. 2017;5.
185. Jiao Y, Li G, Korneva A, Caulk AW, Qin L, Bersi MR, Li Q, Li W, Mecham RP, Humphrey JD and Tellides G. Deficient Circumferential Growth Is the Primary Determinant of Aortic Obstruction Attributable to Partial Elastin Deficiency. *Arterioscler Thromb Vasc Biol*. 2017;37:930-941.
186. Shentu TP, He M, Sun X, Zhang J, Zhang F, Gongol B, Marin TL, Zhang J, Wen L, Wang Y, Geary GG, Zhu Y, Johnson DA and Shyy JY. AMP-Activated Protein Kinase and Sirtuin 1 Coregulation of Cortactin Contributes to Endothelial Function. *Arterioscler Thromb Vasc Biol*. 2016;36:2358-2368.
187. Walji TA, Turecamo SE, DeMarsilis AJ, Sakai LY, Mecham RP and Craft CS. Characterization of metabolic health in mouse models of fibrillin-1 perturbation. *Matrix Biol*. 2016;55:63-76.
188. Varshney R, Ali Q, Wu C and Sun Z. Monocrotaline-Induced Pulmonary Hypertension Involves Downregulation of Antiaging Protein *Klotho* and eNOS Activity. *Hypertension*. 2016;68:1255-1263.
189. Gao D, Zuo Z, Tian J, Ali Q, Lin Y, Lei H and Sun Z. Activation of SIRT1 Attenuates *Klotho* Deficiency-Induced Arterial Stiffness and Hypertension by Enhancing AMP-Activated Protein Kinase Activity. *Hypertension*. 2016;68:1191-1199.
190. Walji TA, Turecamo SE, Sanchez AC, Anthony BA, Abou-Ezzi G, Scheller EL, Link DC, Mecham RP and Craft CS. Marrow Adipose Tissue Expansion Coincides with Insulin Resistance in MAGP1-Deficient Mice. *Front Endocrinol (Lausanne)*. 2016;7:87.
191. Lee VS, Halabi CM, Hoffman EP, Carmichael N, Leshchiner I, Lian CG, Bierhals AJ, Vuzman D, Mecham RP, Frank NY and Stitzel NO. Loss of function mutation in *LOX* causes thoracic aortic aneurysm and dissection in humans. *Proc Natl Acad Sci U S A*. 2016;113:8759-8764.
192. Balestrini JL, Gard AL, Gerhold KA, Wilcox EC, Liu A, Schwan J, Le AV, Baevova P, Dimitrievska S, Zhao L, Sundaram S, Sun H, Rittie L, Dyal R, Broekelmann TJ,

- Mecham RP, Schwartz MA, Niklason LE and White ES. Comparative biology of decellularized lung matrix: Implications of species mismatch in regenerative medicine. *Biomaterials*. 2016;102:220-230.
193. Chen J, Lin Y and Sun Z. Deficiency in the anti-aging gene *Klotho* promotes aortic valve fibrosis through AMPK $\alpha$ -mediated activation of RUNX2. *Aging Cell*. 2016;15:853-860.
194. Jarad G, Knutsen RH, Mecham RP and Miner JH. Albumin contributes to kidney disease progression in Alport syndrome. *Am J Physiol Renal Physiol*. 2016;311:F120-130.
195. Maedeker JA, Stoka KV, Bhayani SA, Gardner WS, Bennett L, Procknow JD, Staiculescu MC, Walji TA, Craft CS and Wagenseil JE. Hypertension and decreased aortic compliance due to reduced elastin amounts do not increase atherosclerotic plaque accumulation in *Ldlr*<sup>-/-</sup> mice. *Atherosclerosis*. 2016;249:22-29.
196. Fan J and Sun Z. The Antiaging Gene *Klotho* Regulates Proliferation and Differentiation of Adipose-Derived Stem Cells. *Stem Cells*. 2016;34:1615-1625.
197. Lin Y, Chen J and Sun Z. Antiaging Gene *Klotho* Deficiency Promoted High-Fat Diet-Induced Arterial Stiffening via Inactivation of AMP-Activated Protein Kinase. *Hypertension*. 2016;67:564-573.
198. Decano JL, Pasion KA, Black N, Giordano NJ, Herrera VL and Ruiz-Opazo N. Sex-specific genetic determinants for arterial stiffness in Dahl salt-sensitive hypertensive rats. *BMC Genet*. 2016;17:19.
199. Raaz U, Zollner AM, Schellinger IN, Toh R, Nakagami F, Brandt M, Emrich FC, Kayama Y, Eken S, Adam M, Maegdefessel L, Hertel T, Deng A, Jagger A, Buerke M, Dalman RL, Spin JM, Kuhl E and Tsao PS. Response to Letters Regarding Article, "Segmental Aortic Stiffening Contributes to Experimental Abdominal Aortic Aneurysm Development". *Circulation*. 2016;133:e11-12.
200. Balestrini JL, Liu A, Gard AL, Huie J, Blatt KM, Schwan J, Zhao L, Broekelmann TJ, Mecham RP, Wilcox EC and Niklason LE. Sterilization of Lung Matrices by Supercritical Carbon Dioxide. *Tissue Eng Part C Methods*. 2016;22:260-269.
201. Kayama Y, Raaz U, Jagger A, Adam M, Schellinger IN, Sakamoto M, Suzuki H, Toyama K, Spin JM and Tsao PS. Diabetic Cardiovascular Disease Induced by Oxidative Stress. *Int J Mol Sci*. 2015;16:25234-25263.
202. Yamashiro Y, Papke CL, Kim J, Ringuette LJ, Zhang QJ, Liu ZP, Mirzaei H, Wagenseil JE, Davis EC and Yanagisawa H. Abnormal mechanosensing and cofilin activation promote the progression of ascending aortic aneurysms in mice. *Sci Signal*. 2015;8:ra105.
203. Zhou X, Chen K, Wang Y, Schuman M, Lei H and Sun Z. Antiaging Gene *Klotho* Regulates Adrenal CYP11B2 Expression and Aldosterone Synthesis. *J Am Soc Nephrol*. 2016;27:1765-1776.
204. Lin Y and Sun Z. Antiaging Gene *Klotho* Attenuates Pancreatic beta-Cell Apoptosis in Type 1 Diabetes. *Diabetes*. 2015;64:4298-4311.
205. Chen K, Zhou X and Sun Z. Haplodeficiency of *Klotho* Gene Causes Arterial Stiffening via Upregulation of Scleraxis Expression and Induction of Autophagy. *Hypertension*. 2015;66:1006-1013.
206. Halabi CM, Broekelmann TJ, Knutsen RH, Ye L, Mecham RP and Kozel BA. Chronic antihypertensive treatment improves pulse pressure but not large artery mechanics in a



- mouse model of congenital vascular stiffness. *Am J Physiol Heart Circ Physiol*. 2015;309:H1008-1016.
207. Raaz U, Schellinger IN, Chernogubova E, Warnecke C, Kayama Y, Penov K, Hennigs JK, Salomons F, Eken S, Emrich FC, Zheng WH, Adam M, Jagger A, Nakagami F, Toh R, Toyama K, Deng A, Buerke M, Maegdefessel L, Hasenfuss G, Spin JM and Tsao PS. Transcription Factor Runx2 Promotes Aortic Fibrosis and Stiffness in Type 2 Diabetes Mellitus. *Circ Res*. 2015;117:513-524.
208. Wang D, Deuse T, Stubbendorff M, Chernogubova E, Erben RG, Eken SM, Jin H, Li Y, Busch A, Heeger CH, Behnisch B, Reichenspurner H, Robbins RC, Spin JM, Tsao PS, Schrepfer S and Maegdefessel L. Local MicroRNA Modulation Using a Novel Anti-miR-21-Eluting Stent Effectively Prevents Experimental In-Stent Restenosis. *Arterioscler Thromb Vasc Biol*. 2015;35:1945-1953.
209. Igoucheva O, Alexeev V, Halabi CM, Adams SM, Stoilov I, Sasaki T, Arita M, Donahue A, Mecham RP, Birk DE and Chu ML. Fibulin-4 E57K Knock-in Mice Recapitulate Cutaneous, Vascular and Skeletal Defects of Recessive Cutis Laxa 1B with both Elastic Fiber and Collagen Fibril Abnormalities. *J Biol Chem*. 2015;290:21443-21459.
210. Craft CS. MAGP1, the extracellular matrix, and metabolism. *Adipocyte*. 2015;4:60-64.
211. DeMarsilis AJ, Walji TA, Maedeker JA, Stoka KV, Kozel BA, Mecham RP, Wagenseil JE and Craft CS. Elastin Insufficiency Predisposes Mice to Impaired Glucose Metabolism. *J Mol Genet Med*. 2014;8.
212. Mecham RP and Gibson MA. The microfibril-associated glycoproteins (MAGPs) and the microfibrillar niche. *Matrix Biol*. 2015;47:13-33.
213. Kim J, Procknow JD, Yanagisawa H and Wagenseil JE. Differences in genetic signaling, and not mechanical properties of the wall, are linked to ascending aortic aneurysms in fibulin-4 knockout mice. *Am J Physiol Heart Circ Physiol*. 2015;309:H103-113.
214. Raaz U, Zollner AM, Schellinger IN, Toh R, Nakagami F, Brandt M, Emrich FC, Kayama Y, Eken S, Adam M, Maegdefessel L, Hertel T, Deng A, Jagger A, Buerke M, Dalman RL, Spin JM, Kuhl E and Tsao PS. Segmental aortic stiffening contributes to experimental abdominal aortic aneurysm development. *Circulation*. 2015;131:1783-1795.
215. Luetkemeyer CM, James RH, Devarakonda ST, Le VP, Liu Q, Han HC and Wagenseil JE. Critical buckling pressure in mouse carotid arteries with altered elastic fibers. *J Mech Behav Biomed Mater*. 2015;46:69-82.
216. Xu Y and Sun Z. Molecular basis of Klotho: from gene to function in aging. *Endocr Rev*. 2015;36:174-193.
217. Le VP, Cheng JK, Kim J, Staiculescu MC, Ficker SW, Sheth SC, Bhayani SA, Mecham RP, Yanagisawa H and Wagenseil JE. Mechanical factors direct mouse aortic remodelling during early maturation. *J R Soc Interface*. 2015;12:20141350.
218. Sun Q, Zhang Z and Sun Z. The potential and challenges of using stem cells for cardiovascular repair and regeneration. *Genes Dis*. 2014;1:113-119.
219. Walker AE, Henson GD, Reihl KD, Morgan RG, Dobson PS, Nielson EI, Ling J, Mecham RP, Li DY, Lesniewski LA and Donato AJ. Greater impairments in cerebral artery compared with skeletal muscle feed artery endothelial function in a mouse model of increased large artery stiffness. *J Physiol*. 2015;593:1931-1943.

220. Chen Z, Wen L, Martin M, Hsu CY, Fang L, Lin FM, Lin TY, Geary MJ, Geary GG, Zhao Y, Johnson DA, Chen JW, Lin SJ, Chien S, Huang HD, Miller YI, Huang PH and Shyy JY. Oxidative stress activates endothelial innate immunity via sterol regulatory element binding protein 2 (SREBP2) transactivation of microRNA-92a. *Circulation*. 2015;131:805-814.
221. Kim J and Wagenseil JE. Bio-Chemo-Mechanical Models of Vascular Mechanics. *Ann Biomed Eng*. 2015;43:1477-1487.
222. Lin Y and Sun Z. In vivo pancreatic beta-cell-specific expression of antiaging gene Klotho: a novel approach for preserving beta-cells in type 2 diabetes. *Diabetes*. 2015;64:1444-1458.
223. Sun Z. Aging, arterial stiffness, and hypertension. *Hypertension*. 2015;65:252-256.
224. Maegdefessel L, Spin JM, Raaz U, Eken SM, Toh R, Azuma J, Adam M, Nakagami F, Heymann HM, Chernogubova E, Jin H, Roy J, Hultgren R, Caidahl K, Schrepfer S, Hamsten A, Eriksson P, McConnell MV, Dalman RL and Tsao PS. miR-24 limits aortic vascular inflammation and murine abdominal aneurysm development. *Nat Commun*. 2014;5:5214.
225. Spin JM and Tsao PS. Battle of the bulge: miR-195 versus miR-29b in aortic aneurysm. *Circ Res*. 2014;115:812-813.
226. Herrera VL, Decano JL, Giordano N, Moran AM and Ruiz-Opazo N. Aortic and carotid arterial stiffness and epigenetic regulator gene expression changes precede blood pressure rise in stroke-prone Dahl salt-sensitive hypertensive rats. *PLoS One*. 2014;9:e107888.
227. Chen Z, Martin M, Li Z and Shyy JY. Endothelial dysfunction: the role of sterol regulatory element-binding protein-induced NOD-like receptor family pyrin domain-containing protein 3 inflammasome in atherosclerosis. *Curr Opin Lipidol*. 2014;25:339-349.
228. Crosswhite P, Chen K and Sun Z. AAV delivery of tumor necrosis factor-alpha short hairpin RNA attenuates cold-induced pulmonary hypertension and pulmonary arterial remodeling. *Hypertension*. 2014;64:1141-1150.
229. Guzy RD, Stoilov I, Elton TJ, Mecham RP and Ornitz DM. Fibroblast growth factor 2 is required for epithelial recovery, but not for pulmonary fibrosis, in response to bleomycin. *Am J Respir Cell Mol Biol*. 2015;52:116-128.
230. Wang Y and Sun Z. Antiaging gene Klotho regulates endothelin-1 levels and endothelin receptor subtype B expression in kidneys of spontaneously hypertensive rats. *J Hypertens*. 2014;32:1629-1636; discussion 1636.
231. Maegdefessel L, Spin JM and Tsao PS. New ways to dismantle a ticking time bomb: microRNA 712/205 and abdominal aortic aneurysm development. *Arterioscler Thromb Vasc Biol*. 2014;34:1339-1340.
232. Zhou X, Chen K, Lei H and Sun Z. Klotho gene deficiency causes salt-sensitive hypertension via monocyte chemotactic protein-1/CC chemokine receptor 2-mediated inflammation. *J Am Soc Nephrol*. 2015;26:121-132.
233. Sun Z. Platelet TLR4: a critical link in pulmonary arterial hypertension. *Circ Res*. 2014;114:1551-1553.
234. Le VP, Stoka KV, Yanagisawa H and Wagenseil JE. Fibulin-5 null mice with decreased arterial compliance maintain normal systolic left ventricular function, but not diastolic function during maturation. *Physiol Rep*. 2014;2:e00257.

235. Deuse T, Hua X, Wang D, Maegdefessel L, Heeren J, Scheja L, Bolanos JP, Rakovic A, Spin JM, Stubbendorff M, Ikeno F, Langer F, Zeller T, Schulte-Uentrop L, Stoehr A, Itagaki R, Haddad F, Eschenhagen T, Blankenberg S, Kiefmann R, Reichenspurner H, Velden J, Klein C, Yeung A, Robbins RC, Tsao PS and Schrepfer S. Dichloroacetate prevents restenosis in preclinical animal models of vessel injury. *Nature*. 2014;509:641-644.
236. Crosswhite P and Sun Z. Molecular mechanisms of pulmonary arterial remodeling. *Mol Med*. 2014;20:191-201.
237. Le VP, Yamashiro Y, Yanagisawa H and Wagenseil JE. Measuring, reversing, and modeling the mechanical changes due to the absence of Fibulin-4 in mouse arteries. *Biomech Model Mechanobiol*. 2014;13:1081-1095.
238. Craft CS, Pietka TA, Schappe T, Coleman T, Combs MD, Klein S, Abumrad NA and Mecham RP. The extracellular matrix protein MAGP1 supports thermogenesis and protects against obesity and diabetes through regulation of TGF-beta. *Diabetes*. 2014;63:1920-1932.
239. Osei-Owusu P, Knutsen RH, Kozel BA, Dietrich HH, Blumer KJ and Mecham RP. Altered reactivity of resistance vasculature contributes to hypertension in elastin insufficiency. *Am J Physiol Heart Circ Physiol*. 2014;306:H654-666.
240. Gabriela Espinosa M, Gardner WS, Bennett L, Sather BA, Yanagisawa H and Wagenseil JE. The effects of elastic fiber protein insufficiency and treatment on the modulus of arterial smooth muscle cells. *J Biomech Eng*. 2014;136:021030.
241. Combs MD, Knutsen RH, Broekelmann TJ, Toennies HM, Brett TJ, Miller CA, Kober DL, Craft CS, Atkinson JJ, Shipley JM, Trask BC and Mecham RP. Microfibril-associated glycoprotein 2 (MAGP2) loss of function has pleiotropic effects in vivo. *J Biol Chem*. 2013;288:28869-28880.
242. Lin Y, Kuro-o M and Sun Z. Genetic deficiency of anti-aging gene klotho exacerbates early nephropathy in STZ-induced diabetes in male mice. *Endocrinology*. 2013;154:3855-3863.
243. Raaz U, Toh R, Maegdefessel L, Adam M, Nakagami F, Emrich FC, Spin JM and Tsao PS. Hemodynamic regulation of reactive oxygen species: implications for vascular diseases. *Antioxid Redox Signal*. 2014;20:914-928.
244. Benbrook DM, Guruswamy S, Wang Y, Sun Z, Mohammed A, Zhang Y, Li Q and Rao CV. Chemoprevention of colon and small intestinal tumorigenesis in APC(min/+) mice by SHetA2 (NSC721689) without toxicity. *Cancer Prev Res (Phila)*. 2013;6:908-916.
245. Xiao H, Lu M, Lin TY, Chen Z, Chen G, Wang WC, Marin T, Shentu TP, Wen L, Gongol B, Sun W, Liang X, Chen J, Huang HD, Pedra JH, Johnson DA and Shyy JY. Sterol regulatory element binding protein 2 activation of NLRP3 inflammasome in endothelium mediates hemodynamic-induced atherosclerosis susceptibility. *Circulation*. 2013;128:632-642.
246. Sun Z, Lei H and Zhang Z. Pre-B cell colony enhancing factor (PBEF), a cytokine with multiple physiological functions. *Cytokine Growth Factor Rev*. 2013;24:433-442.
247. Wen L, Chen Z, Zhang F, Cui X, Sun W, Geary GG, Wang Y, Johnson DA, Zhu Y, Chien S and Shyy JY. Ca<sup>2+</sup>/calmodulin-dependent protein kinase beta phosphorylation of Sirtuin 1 in endothelium is atheroprotective. *Proc Natl Acad Sci U S A*. 2013;110:E2420-2427.

248. Adam M, Raaz U, Spin JM and Tsao PS. MicroRNAs in Abdominal Aortic Aneurysm. *Curr Vasc Pharmacol*. 2015;13:280-290.
249. Le VP and Wagenseil JE. Echocardiographic Characterization of Postnatal Development in Mice with Reduced Arterial Elasticity. *Cardiovasc Eng Technol*. 2012;3:424-438.
250. Huang J, Yamashiro Y, Papke CL, Ikeda Y, Lin Y, Patel M, Inagami T, Le VP, Wagenseil JE and Yanagisawa H. Angiotensin-converting enzyme-induced activation of local angiotensin signaling is required for ascending aortic aneurysms in fibulin-4-deficient mice. *Sci Transl Med*. 2013;5:183ra158, 181-111.
251. Chen Z, Shentu TP, Wen L, Johnson DA and Shyy JY. Regulation of SIRT1 by oxidative stress-responsive miRNAs and a systematic approach to identify its role in the endothelium. *Antioxid Redox Signal*. 2013;19:1522-1538.
252. Chen Z, Lai TC, Jan YH, Lin FM, Wang WC, Xiao H, Wang YT, Sun W, Cui X, Li YS, Fang T, Zhao H, Padmanabhan C, Sun R, Wang DL, Jin H, Chau GY, Huang HD, Hsiao M and Shyy JY. Hypoxia-responsive miRNAs target argonaute 1 to promote angiogenesis. *J Clin Invest*. 2013;123:1057-1067.
253. Sather BA, Hageman D and Wagenseil JE. Murray's Law in elastin haploinsufficient (Eln<sup>+/-</sup>) and wild-type (WT) mice. *J Biomech Eng*. 2012;134:124504.
254. Crosswhite P and Sun Z. Inhibition of phosphodiesterase-1 attenuates cold-induced pulmonary hypertension. *Hypertension*. 2013;61:585-592.
255. Wang X, Skelley L, Wang B, Mejia A, Sapozhnikov V and Sun Z. AAV-based RNAi silencing of NADPH oxidase gp91(phox) attenuates cold-induced cardiovascular dysfunction. *Hum Gene Ther*. 2012;23:1016-1026.
256. Cheng JK, Stoilov I, Mecham RP and Wagenseil JE. A fiber-based constitutive model predicts changes in amount and organization of matrix proteins with development and disease in the mouse aorta. *Biomech Model Mechanobiol*. 2013;12:497-510.
257. Wang X, Wang Q and Sun Z. Normal IgG downregulates the intracellular superoxide level and attenuates migration and permeability in human aortic endothelial cells isolated from a hypertensive patient. *Hypertension*. 2012;60:818-826.
258. Lin Y and Sun Z. Antiaging gene Klotho enhances glucose-induced insulin secretion by up-regulating plasma membrane levels of TRPV2 in MIN6 beta-cells. *Endocrinology*. 2012;153:3029-3039.
259. Cheng JK and Wagenseil JE. Extracellular matrix and the mechanics of large artery development. *Biomech Model Mechanobiol*. 2012;11:1169-1186.
260. Sugitani H, Hirano E, Knutsen RH, Shifren A, Wagenseil JE, Ciliberto C, Kozel BA, Urban Z, Davis EC, Broekelmann TJ and Mecham RP. Alternative splicing and tissue-specific elastin misassembly act as biological modifiers of human elastin gene frameshift mutations associated with dominant cutis laxa. *J Biol Chem*. 2012;287:22055-22067.
261. Peng IC, Chen Z, Sun W, Li YS, Marin TL, Hsu PH, Su MI, Cui X, Pan S, Lytle CY, Johnson DA, Blaeser F, Chatila T and Shyy JY. Glucagon regulates ACC activity in adipocytes through the CAMKKbeta/AMPK pathway. *Am J Physiol Endocrinol Metab*. 2012;302:E1560-1568.
262. Le VP, Kovacs A and Wagenseil JE. Measuring left ventricular pressure in late embryonic and neonatal mice. *J Vis Exp*. 2012.
263. Amin M, Le VP and Wagenseil JE. Mechanical testing of mouse carotid arteries: from newborn to adult. *J Vis Exp*. 2012.

264. Wagenseil JE and Mecham RP. Elastin in large artery stiffness and hypertension. *J Cardiovasc Transl Res.* 2012;5:264-273.
265. Wang Y, Kuro-o M and Sun Z. Klotho gene delivery suppresses Nox2 expression and attenuates oxidative stress in rat aortic smooth muscle cells via the cAMP-PKA pathway. *Aging Cell.* 2012;11:410-417.
266. Kozel BA, Knutsen RH, Ye L, Ciliberto CH, Broekelmann TJ and Mecham RP. Genetic modifiers of cardiovascular phenotype caused by elastin haploinsufficiency act by extrinsic noncomplementation. *J Biol Chem.* 2011;286:44926-44936.
267. Dammanahalli JK, Wang X and Sun Z. Genetic interleukin-10 deficiency causes vascular remodeling via the upregulation of Nox1. *J Hypertens.* 2011;29:2116-2125.
268. Hidalgo-Tamola J, Luttrell I, Jiang X, Li D, Mecham RP and Chitaleky K. Characterization of erectile function in elastin haploinsufficient mice. *J Sex Med.* 2011;8:3075-3085.
269. Amin M, Kunkel AG, Le VP and Wagenseil JE. Effect of storage duration on the mechanical behavior of mouse carotid artery. *J Biomech Eng.* 2011;133:071007.
270. Le VP, Knutsen RH, Mecham RP and Wagenseil JE. Decreased aortic diameter and compliance precedes blood pressure increases in postnatal development of elastin-insufficient mice. *Am J Physiol Heart Circ Physiol.* 2011;301:H221-229.
271. Fu Y, Hou Y, Fu C, Gu M, Li C, Kong W, Wang X, Shyy JY and Zhu Y. A novel mechanism of gamma/delta T-lymphocyte and endothelial activation by shear stress: the role of ecto-ATP synthase beta chain. *Circ Res.* 2011;108:410-417.
272. Watts CR, Knutsen RH, Ciliberto C and Mecham RP. Evidence for heterozygous abnormalities of the elastin gene (ELN) affecting the quantity of vocal fold elastic fibers: a pilot study. *J Voice.* 2011;25:e85-90.
273. Weinbaum JS, Tranquillo RT and Mecham RP. The matrix-binding domain of microfibril-associated glycoprotein-1 targets active connective tissue growth factor to a fibroblast-produced extracellular matrix. *Macromol Biosci.* 2010;10:1338-1344.
274. Craft CS, Zou W, Watkins M, Grimston S, Brodt MD, Broekelmann TJ, Weinbaum JS, Teitelbaum SL, Pierce RA, Civitelli R, Silva MJ and Mecham RP. Microfibril-associated glycoprotein-1, an extracellular matrix regulator of bone remodeling. *J Biol Chem.* 2010;285:23858-23867.
275. Raveaud S, Mezin P, Lavanchy N, Starcher B, Mecham RP, Verdetti J and Fauray G. Effects of chronic treatment with a low dose of nicorandil on the function of the rat aorta during ageing. *Clin Exp Pharmacol Physiol.* 2009;36:988-994.
276. Ahn SY and Gupta C. Genetic Programming of Hypertension. *Frontiers in pediatrics.* 2017;5:285.
277. Burrello J, Monticone S, Buffolo F, Tetti M, Veglio F, Williams TA and Mulatero P. Is There a Role for Genomics in the Management of Hypertension? *International journal of molecular sciences.* 2017;18.
278. Arwood MJ, Cavallari LH and Duarte JD. Pharmacogenomics of hypertension and heart disease. *Curr Hypertens Rep.* 2015;17:586.
279. Byrd JB. Personalized medicine and treatment approaches in hypertension: current perspectives. *Integrated blood pressure control.* 2016;9:59-67.
280. Costa A and Franco OL. Impact and influence of "omics" technology on hypertension studies. *International journal of cardiology.* 2017;228:1022-1034.

281. Currie G and Delles C. The Future of "Omics" in Hypertension. *Can J Cardiol.* 2017;33:601-610.
282. Deng AY. Genetic mechanisms of polygenic hypertension: fundamental insights from experimental models. *J Hypertens.* 2015;33:669-680; discussion 680.
283. Dodoo SN and Benjamin IJ. Genomic Approaches to Hypertension. *Cardiology clinics.* 2017;35:185-196.
284. Dominiczak A, Delles C and Padmanabhan S. Genomics and Precision Medicine for Clinicians and Scientists in Hypertension. *Hypertension.* 2017;69:e10-e13.
285. Doris PA. Genetics of hypertension: an assessment of progress in the spontaneously hypertensive rat. *Physiol Genomics.* 2017;49:601-617.
286. Eadon MT and Chapman AB. A Physiologic Approach to the Pharmacogenomics of Hypertension. *Adv Chronic Kidney Dis.* 2016;23:91-105.
287. Feng AF, Liu ZH, Zhou SL, Zhao SY, Zhu YX and Wang HX. Effects of AMPD1 gene C34T polymorphism on cardiac index, blood pressure and prognosis in patients with cardiovascular diseases: a meta-analysis. *BMC cardiovascular disorders.* 2017;17:174.
288. Flaten HK and Monte AA. The Pharmacogenomic and Metabolomic Predictors of ACE Inhibitor and Angiotensin II Receptor Blocker Effectiveness and Safety. *Cardiovascular drugs and therapy.* 2017;31:471-482.
289. Han L, Liu Y, Duan S, Perry B, Li W and He Y. DNA methylation and hypertension: emerging evidence and challenges. *Briefings in functional genomics.* 2016;15:460-469.
290. Jain KK. Personalized Management of Cardiovascular Disorders. *Medical principles and practice : international journal of the Kuwait University, Health Science Centre.* 2017;26:399-414.
291. Leimena C and Qiu H. Non-Coding RNA in the Pathogenesis, Progression and Treatment of Hypertension. *International journal of molecular sciences.* 2018;19.
292. Luft FC. What Have We Learned from the Genetics of Hypertension? *The Medical clinics of North America.* 2017;101:195-206.
293. Ma H, Sun G, Wang W, Zhou Y, Liu D, Tong Y and Lu Z. Association Between Interleukin-6 -572 C>G and -174 G>C Polymorphisms and Hypertension: A Meta-analysis of Case-control Studies. *Medicine (Baltimore).* 2016;95:e2416.
294. McAuley E, McNulty H, Hughes C, Strain JJ and Ward M. Riboflavin status, MTHFR genotype and blood pressure: current evidence and implications for personalised nutrition. *The Proceedings of the Nutrition Society.* 2016;75:405-414.
295. McNulty H, Strain JJ, Hughes CF and Ward M. Riboflavin, MTHFR genotype and blood pressure: A personalized approach to prevention and treatment of hypertension. *Molecular aspects of medicine.* 2017;53:2-9.
296. Murakami K. Non-coding RNAs and hypertension-unveiling unexpected mechanisms of hypertension by the dark matter of the genome. *Current hypertension reviews.* 2015;11:80-90.
297. Olsen MH, Angell SY, Asma S, Boutouyrie P, Burger D, Chirinos JA, Damasceno A, Delles C, Gimenez-Roqueplo AP, Hering D, Lopez-Jaramillo P, Martinez F, Perkovic V, Rietzschel ER, Schillaci G, Schutte AE, Scuteri A, Sharman JE, Wachtell K and Wang JG. A call to action and a lifecourse strategy to address the global burden of raised blood pressure on current and future generations: the Lancet Commission on hypertension. *Lancet.* 2016;388:2665-2712.

298. Padmanabhan S, Aman A and Dominiczak AF. Genomics of hypertension. *Pharmacological research*. 2017;121:219-229.
299. Padmanabhan S, Aman A and Dominiczak AF. Recent Findings in the Genetics of Blood Pressure: How to Apply in Practice or Is a Moonshot Required? *Curr Hypertens Rep*. 2018;20:54.
300. Padmanabhan S and Joe B. Towards Precision Medicine for Hypertension: A Review of Genomic, Epigenomic, and Microbiomic Effects on Blood Pressure in Experimental Rat Models and Humans. *Physiol Rev*. 2017;97:1469-1528.
301. Parati G, Ochoa JE and Bilo G. Moving Beyond Office Blood Pressure to Achieve a Personalized and More Precise Hypertension Management: Which Way to Go? *Hypertension*. 2017.
302. Russo A, Di Gaetano C, Cugliari G and Matullo G. Advances in the Genetics of Hypertension: The Effect of Rare Variants. *International journal of molecular sciences*. 2018;19.
303. Ruzicka M, Burns KD and Hiremath S. Precision Medicine for Hypertension Management in Chronic Kidney Disease: Relevance of SPRINT for Therapeutic Targets in Nondiabetic Renal Disease. *Can J Cardiol*. 2017;33:611-618.
304. Salvi E, Wang Z, Rizzi F, Gong Y, McDonough CW, Padmanabhan S, Hiltunen TP, Lanzani C, Zaninello R, Chittani M, Bailey KR, Sarin AP, Barcella M, Melander O, Chapman AB, Manunta P, Kontula KK, Glorioso N, Cusi D, Dominiczak AF, Johnson JA, Barlassina C, Boerwinkle E, Cooper-DeHoff RM and Turner ST. Genome-Wide and Gene-Based Meta-Analyses Identify Novel Loci Influencing Blood Pressure Response to Hydrochlorothiazide. *Hypertension*. 2017;69:51-59.
305. Savoia C, Volpe M, Grassi G, Borghi C, Agabiti Rosei E and Touyz RM. Personalized medicine-a modern approach for the diagnosis and management of hypertension. *Clin Sci (Lond)*. 2017;131:2671-2685.
306. Scherrer U, Rimoldi SF, Sartori C, Messerli FH and Rexhaj E. Fetal programming and epigenetic mechanisms in arterial hypertension. *Current opinion in cardiology*. 2015;30:393-397.
307. Seidel E and Scholl UI. Genetic mechanisms of human hypertension and their implications for blood pressure physiology. *Physiol Genomics*. 2017;49:630-652.
308. Shahin MH and Johnson JA. Mechanisms and pharmacogenetic signals underlying thiazide diuretics blood pressure response. *Current opinion in pharmacology*. 2016;27:31-37.
309. Shi L, Liao J, Liu B, Zeng F and Zhang L. Mechanisms and therapeutic potential of microRNAs in hypertension. *Drug discovery today*. 2015;20:1188-1204.
310. Stoll S, Wang C and Qiu H. DNA Methylation and Histone Modification in Hypertension. *International journal of molecular sciences*. 2018;19.
311. Sun D, Liu J, Xiao L, Liu Y, Wang Z, Li C, Jin Y, Zhao Q and Wen S. Recent development of risk-prediction models for incident hypertension: An updated systematic review. *PLoS One*. 2017;12:e0187240.
312. Waken RJ, de Las Fuentes L and Rao DC. A Review of the Genetics of Hypertension with a Focus on Gene-Environment Interactions. *Curr Hypertens Rep*. 2017;19:23.
313. Wang J, Wang Z and Yu C. Association of Polymorphisms in the Atrial Natriuretic Factor Gene with the Risk of Essential Hypertension: A Systematic Review and Meta-Analysis. *International journal of environmental research and public health*. 2016;13.

314. Whelton PK, Einhorn PT, Muntner P, Appel LJ, Cushman WC, Diez Roux AV, Ferdinand KC, Rahman M, Taylor HA, Ard J, Arnett DK, Carter BL, Davis BR, Freedman BI, Cooper LA, Cooper R, Desvigne-Nickens P, Gavini N, Go AS, Hyman DJ, Kimmel PL, Margolis KL, Miller ER, 3rd, Mills KT, Mensah GA, Navar AM, Ogedegbe G, Rakotz MK, Thomas G, Tobin JN, Wright JT, Yoon SS and Cutler JA. Research Needs to Improve Hypertension Treatment and Control in African Americans. *Hypertension*. 2016;68:1066-1072.
315. Wise IA and Charchar FJ. Epigenetic Modifications in Essential Hypertension. *International journal of molecular sciences*. 2016;17:451.
316. Zhang H, Sun ZQ, Liu SS and Yang LN. Association between GRK4 and DRD1 gene polymorphisms and hypertension: a meta-analysis. *Clinical interventions in aging*. 2016;11:17-27.
